# Supplementary material for: Aminoacetonitrile as precursor for nitrogen rich stable and insensitive asymmetric N-methylene-C linked tetrazole-based energetic compounds
Source: Royal Society of Chemistry journal article supplement (doi:10.1039/c7ta05394k), 2017-01-01
Supplement: c7ta05394k1.pdf [file c7ta05394k1.pdf]

## **Electronic Supplementary Information**

# **Aminoacetonitrile as Precursor for Nitrogen Rich Stable and Insensitive Asymmetric N-Methylene-C Linked Tetrazole-Based Energetic Compounds**

Dheeraj Kumar, Lauren A. Mitchell, Damon A. Parrish and Jean'ne M. Shreeve\*

### **Table of contents**

|    |                                   |     |
|----|-----------------------------------|-----|
| 1. | Isodesmic Reactions               | S2  |
| 2. | Crystal Structure data            | S3  |
| 3. | Energetic properties of compounds | S12 |

## 1. Isodesmic Reactions

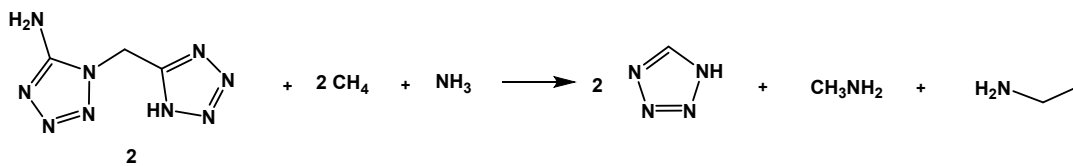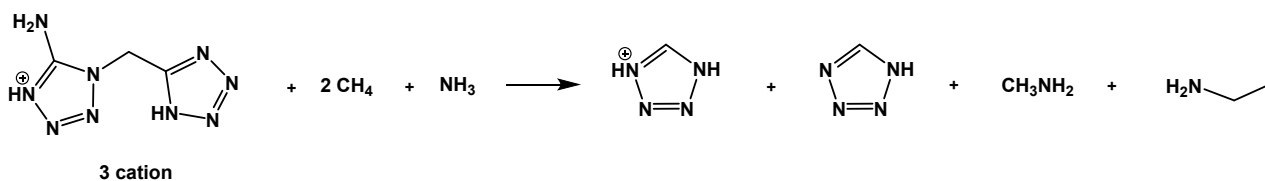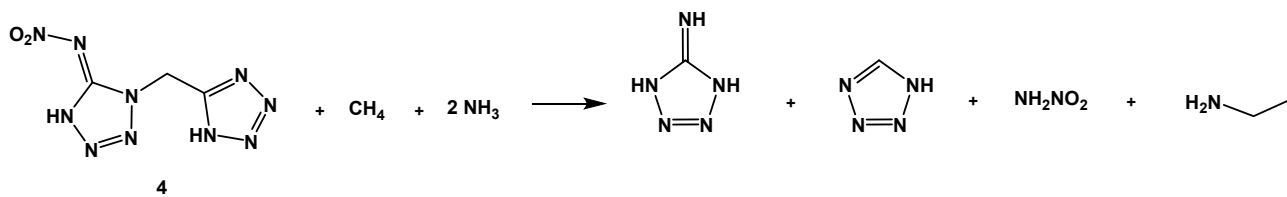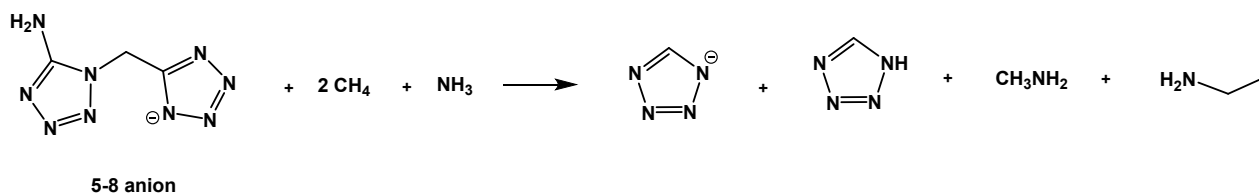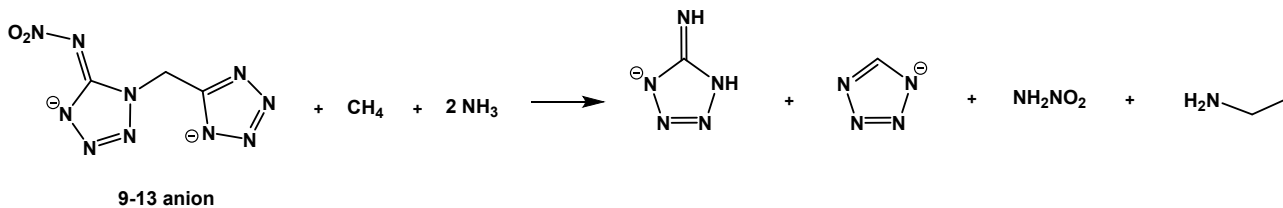

Scheme S1: Isodesmic reactions for the compounds 2 - 13

### 3. Crystal Structure Data

**Table S1.** Crystal data and structure refinement for Compound 2.

|                                   |                                                   |                  |
|-----------------------------------|---------------------------------------------------|------------------|
| Identification code               | shrv413                                           |                  |
| Empirical formula                 | C <sub>3</sub> H <sub>5</sub> N <sub>9</sub>      |                  |
| Formula weight                    | 167.16                                            |                  |
| Temperature                       | 150(2) K                                          |                  |
| Wavelength                        | 0.71073 Å                                         |                  |
| Crystal system                    | Triclinic                                         |                  |
| Space group                       | P-1                                               |                  |
| Unit cell dimensions              | a = 4.940(3) Å                                    | α = 97.538(9)°.  |
|                                   | b = 5.906(4) Å                                    | β = 90.277(8)°.  |
|                                   | c = 12.109(7) Å                                   | γ = 105.359(9)°. |
| Volume                            | 337.5(3) Å <sup>3</sup>                           |                  |
| Z                                 | 2                                                 |                  |
| Density (-123°C)                  | 1.645 Mg/m <sup>3</sup>                           |                  |
| Density (20°C)                    | 1.616 Mg/m <sup>3</sup>                           |                  |
| Absorption coefficient            | 0.127 mm <sup>-1</sup>                            |                  |
| F(000)                            | 172                                               |                  |
| Crystal size                      | 0.200 x 0.150 x 0.030 mm <sup>3</sup>             |                  |
| Theta range for data collection   | 1.698 to 26.066°.                                 |                  |
| Index ranges                      | -6 ≤ h ≤ 6, -7 ≤ k ≤ 7, 0 ≤ l ≤ 14                |                  |
| Reflections collected             | 1164                                              |                  |
| Independent reflections           | 1164 [R <sub>int</sub> = 0.0218]                  |                  |
| Completeness to theta = 25.242°   | 91.6 %                                            |                  |
| Absorption correction             | Semi-empirical from equivalents                   |                  |
| Max. and min. transmission        | 0.745370 and 0.641986                             |                  |
| Refinement method                 | Full-matrix least-squares on F <sup>2</sup>       |                  |
| Data / restraints / parameters    | 1164 / 2 / 116                                    |                  |
| Goodness-of-fit on F <sup>2</sup> | 1.106                                             |                  |
| Final R indices [I > 2σ(I)]       | R <sub>1</sub> = 0.0293, wR <sub>2</sub> = 0.0676 |                  |
| R indices (all data)              | R <sub>1</sub> = 0.0332, wR <sub>2</sub> = 0.0725 |                  |
| Largest diff. peak and hole       | 0.187 and -0.198 e.Å <sup>-3</sup>                |                  |
| CCDC No                           | 1554453                                           |                  |

**Table S2.** Bond lengths [Å] and angles [°] for Compound 2.

|           |          |
|-----------|----------|
| N(1)-C(2) | 1.326(3) |
| C(2)-N(3) | 1.336(2) |
| C(2)-N(6) | 1.351(2) |
| N(4)-N(5) | 1.288(2) |
| N(4)-N(3) | 1.361(3) |
| N(6)-N(5) | 1.364(2) |

|                   |            |
|-------------------|------------|
| N(6)-C(7)         | 1.458(2)   |
| C(7)-C(8)         | 1.498(3)   |
| C(8)-N(12)        | 1.317(2)   |
| C(8)-N(9)         | 1.336(2)   |
| N(9)-N(10)        | 1.344(2)   |
| N(11)-N(10)       | 1.296(2)   |
| N(11)-N(12)       | 1.367(2)   |
|                   |            |
| N(1)-C(2)-N(3)    | 126.09(18) |
| N(1)-C(2)-N(6)    | 126.09(17) |
| N(3)-C(2)-N(6)    | 107.82(18) |
| N(5)-N(4)-N(3)    | 112.51(16) |
| C(2)-N(3)-N(4)    | 105.36(16) |
| C(2)-N(6)-N(5)    | 108.91(15) |
| C(2)-N(6)-C(7)    | 129.91(17) |
| N(5)-N(6)-C(7)    | 120.78(15) |
| N(4)-N(5)-N(6)    | 105.39(16) |
| N(6)-C(7)-C(8)    | 110.07(15) |
| N(12)-C(8)-N(9)   | 108.75(16) |
| N(12)-C(8)-C(7)   | 124.85(15) |
| N(9)-C(8)-C(7)    | 126.36(15) |
| C(8)-N(9)-N(10)   | 108.92(14) |
| N(10)-N(11)-N(12) | 111.09(15) |
| N(11)-N(10)-N(9)  | 105.95(14) |
| C(8)-N(12)-N(11)  | 105.29(14) |

**Table S3.** Hydrogen bonds for Compound **2** [Å and °].

| D-H...A             | d(D-H)    | d(H...A)  | d(D...A) | <(DHA) |
|---------------------|-----------|-----------|----------|--------|
| N(1)-H(1A)...N(3)#1 | 0.893(16) | 2.080(16) | 2.962(3) | 170(2) |
| N(1)-H(1B)...N(4)#2 | 0.879(16) | 2.117(16) | 2.994(3) | 175(2) |
| N(9)-H(9)...N(11)#3 | 0.88      | 1.99      | 2.851(3) | 164.0  |

Symmetry transformations used to generate equivalent atoms:

#1 -x+2,-y,-z+1 #2 x,y+1,z #3 x-1,y,z

**Table S4.** Crystal data and structure refinement for Compound 4.

|                                   |                                                              |                    |
|-----------------------------------|--------------------------------------------------------------|--------------------|
| Identification code               | shrv475                                                      |                    |
| Empirical formula                 | C <sub>3</sub> H <sub>4</sub> N <sub>10</sub> O <sub>2</sub> |                    |
| Formula weight                    | 212.16                                                       |                    |
| Temperature                       | 150(2) K                                                     |                    |
| Wavelength                        | 0.71073 Å                                                    |                    |
| Crystal system                    | Monoclinic                                                   |                    |
| Space group                       | C2/c                                                         |                    |
| Unit cell dimensions              | a = 15.6803(6) Å                                             | α = 90°.           |
|                                   | b = 6.6171(3) Å                                              | β = 115.8700(10)°. |
|                                   | c = 17.0112(7) Å                                             | γ = 90°.           |
| Volume                            | 1588.17(12) Å <sup>3</sup>                                   |                    |
| Z                                 | 8                                                            |                    |
| Density (-123°C)                  | 1.775 Mg/m <sup>3</sup>                                      |                    |
| Density (20°C)                    | 1.755 Mg/m <sup>3</sup>                                      |                    |
| Absorption coefficient            | 0.150 mm <sup>-1</sup>                                       |                    |
| F(000)                            | 864                                                          |                    |
| Crystal size                      | 0.283 x 0.162 x 0.074 mm <sup>3</sup>                        |                    |
| Theta range for data collection   | 2.887 to 29.970°.                                            |                    |
| Index ranges                      | -21 ≤ h ≤ 21, -9 ≤ k ≤ 7, -23 ≤ l ≤ 23                       |                    |
| Reflections collected             | 9002                                                         |                    |
| Independent reflections           | 2222 [R <sub>int</sub> = 0.0165]                             |                    |
| Completeness to theta = 25.242°   | 99.6 %                                                       |                    |
| Absorption correction             | Semi-empirical from equivalents                              |                    |
| Max. and min. transmission        | 0.7460 and 0.7083                                            |                    |
| Refinement method                 | Full-matrix least-squares on F <sup>2</sup>                  |                    |
| Data / restraints / parameters    | 2222 / 0 / 136                                               |                    |
| Goodness-of-fit on F <sup>2</sup> | 1.053                                                        |                    |
| Final R indices [I > 2σ(I)]       | R <sub>1</sub> = 0.0336, wR <sub>2</sub> = 0.0863            |                    |
| R indices (all data)              | R <sub>1</sub> = 0.0385, wR <sub>2</sub> = 0.0899            |                    |
| Largest diff. peak and hole       | 0.436 and -0.292 e.Å <sup>-3</sup>                           |                    |
| CCDC No                           | 1554454                                                      |                    |

**Table S5.** Bond lengths [Å] and angles [°] for Compound 4.

|            |            |             |            |
|------------|------------|-------------|------------|
| O(1)-N(3)  | 1.2380(12) | O(2)-N(3)   | 1.2413(12) |
| N(3)-N(4)  | 1.3520(11) | N(4)-C(5)   | 1.3382(13) |
| C(5)-N(6)  | 1.3493(13) | C(5)-N(9)   | 1.3514(12) |
| N(6)-N(7)  | 1.3704(12) | N(6)-H(6)   | 0.8800     |
| N(7)-N(8)  | 1.2777(13) | N(8)-N(9)   | 1.3599(12) |
| N(9)-C(10) | 1.4563(12) | C(10)-C(11) | 1.4989(15) |

|                     |            |                    |            |
|---------------------|------------|--------------------|------------|
| C(10)-H(10A)        | 0.9900     | C(10)-H(10B)       | 0.9900     |
| C(11)-N(15)         | 1.3211(13) | C(11)-N(12)        | 1.3338(13) |
| N(12)-N(13)         | 1.3442(14) | N(12)-H(12)        | 0.8800     |
| N(13)-N(14)         | 1.2930(13) | N(14)-N(15)        | 1.3636(13) |
| O(1)-N(3)-O(2)      | 122.37(9)  | O(1)-N(3)-N(4)     | 122.19(9)  |
| O(2)-N(3)-N(4)      | 115.43(8)  | C(5)-N(4)-N(3)     | 114.78(8)  |
| N(4)-C(5)-N(6)      | 136.96(9)  | N(4)-C(5)-N(9)     | 119.23(9)  |
| N(6)-C(5)-N(9)      | 103.80(8)  | C(5)-N(6)-N(7)     | 109.58(8)  |
| C(5)-N(6)-H(6)      | 125.2      | N(7)-N(6)-H(6)     | 125.2      |
| N(8)-N(7)-N(6)      | 108.42(9)  | N(7)-N(8)-N(9)     | 107.75(8)  |
| C(5)-N(9)-N(8)      | 110.45(8)  | C(5)-N(9)-C(10)    | 127.37(8)  |
| N(8)-N(9)-C(10)     | 122.18(8)  | N(9)-C(10)-C(11)   | 110.39(8)  |
| N(9)-C(10)-H(10A)   | 109.6      | C(11)-C(10)-H(10A) | 109.6      |
| N(9)-C(10)-H(10B)   | 109.6      | C(11)-C(10)-H(10B) | 109.6      |
| H(10A)-C(10)-H(10B) | 108.1      | N(15)-C(11)-N(12)  | 107.93(10) |
| N(15)-C(11)-C(10)   | 126.26(9)  | N(12)-C(11)-C(10)  | 125.81(9)  |
| C(11)-N(12)-N(13)   | 109.14(9)  | C(11)-N(12)-H(12)  | 125.4      |
| N(13)-N(12)-H(12)   | 125.4      | N(14)-N(13)-N(12)  | 106.39(9)  |
| N(13)-N(14)-N(15)   | 110.37(9)  | C(11)-N(15)-N(14)  | 106.16(9)  |

**Table S6.** Hydrogen bonds for Compound 4 [ $\text{\AA}$  and  $^\circ$ ].

| D-H...A              | d(D-H) | d(H...A) | d(D...A)   | $\angle(\text{DHA})$ |
|----------------------|--------|----------|------------|----------------------|
| N(6)-H(6)...O(1)     | 0.88   | 2.15     | 2.5937(13) | 110.4                |
| N(6)-H(6)...N(15)#1  | 0.88   | 1.92     | 2.7603(12) | 159.6                |
| N(12)-H(12)...O(2)#2 | 0.88   | 2.44     | 3.0617(13) | 128.2                |
| N(12)-H(12)...O(2)#3 | 0.88   | 2.04     | 2.8614(12) | 155.0                |

Symmetry transformations used to generate equivalent atoms:

#1  $-x+3/2, y+1/2, -z+3/2$  #2  $-x+1, y, -z+3/2$  #3  $x, -y+1, z+1/2$

**Table S7.** Crystal data and structure refinement for Compound **10**.

|                                   |                                                               |                   |
|-----------------------------------|---------------------------------------------------------------|-------------------|
| Identification code               | shrv431                                                       |                   |
| Empirical formula                 | C <sub>3</sub> H <sub>10</sub> N <sub>12</sub> O <sub>2</sub> |                   |
| Formula weight                    | 246.23                                                        |                   |
| Temperature                       | 150(2) K                                                      |                   |
| Wavelength                        | 0.71073 Å                                                     |                   |
| Crystal system                    | Monoclinic                                                    |                   |
| Space group                       | P2 <sub>1</sub> /c                                            |                   |
| Unit cell dimensions              | a = 5.8835(3) Å                                               | α = 90°.          |
|                                   | b = 16.3726(7) Å                                              | β = 98.4240(10)°. |
|                                   | c = 10.5070(4) Å                                              | γ = 90°.          |
| Volume                            | 1001.20(8) Å <sup>3</sup>                                     |                   |
| Z                                 | 4                                                             |                   |
| Density (-123°C)                  | 1.634 Mg/m <sup>3</sup>                                       |                   |
| Denisty (20°C)                    | 1.614 Mg/m <sup>3</sup>                                       |                   |
| Absorption coefficient            | 0.136 mm <sup>-1</sup>                                        |                   |
| F(000)                            | 512                                                           |                   |
| Crystal size                      | 0.421 x 0.339 x 0.259 mm <sup>3</sup>                         |                   |
| Theta range for data collection   | 2.321 to 29.979°.                                             |                   |
| Index ranges                      | -8 ≤ h ≤ 7, -21 ≤ k ≤ 22, -14 ≤ l ≤ 14                        |                   |
| Reflections collected             | 13803                                                         |                   |
| Independent reflections           | 2823 [R <sub>int</sub> = 0.0167]                              |                   |
| Completeness to theta = 25.242°   | 100.0 %                                                       |                   |
| Absorption correction             | Semi-empirical from equivalents                               |                   |
| Max. and min. transmission        | 0.7460 and 0.7105                                             |                   |
| Refinement method                 | Full-matrix least-squares on F <sup>2</sup>                   |                   |
| Data / restraints / parameters    | 2823 / 0 / 178                                                |                   |
| Goodness-of-fit on F <sup>2</sup> | 1.052                                                         |                   |
| Final R indices [I > 2σ(I)]       | R <sub>1</sub> = 0.0303, wR <sub>2</sub> = 0.0798             |                   |
| R indices (all data)              | R <sub>1</sub> = 0.0324, wR <sub>2</sub> = 0.0818             |                   |
| Largest diff. peak and hole       | 0.404 and -0.270 e.Å <sup>-3</sup>                            |                   |
| CCDC No                           | 1554455                                                       |                   |

**Table S8.** Bond lengths [Å] and angles [°] for Compound **10**.

|              |            |              |            |
|--------------|------------|--------------|------------|
| O(1)-N(3)    | 1.2693(9)  | O(2)-N(3)    | 1.2483(10) |
| N(3)-N(4)    | 1.3171(10) | N(4)-C(5)    | 1.3703(10) |
| C(5)-N(6)    | 1.3376(10) | C(5)-N(9)    | 1.3517(10) |
| N(6)-N(7)    | 1.3698(11) | N(7)-N(8)    | 1.2946(11) |
| N(8)-N(9)    | 1.3499(9)  | N(9)-C(10)   | 1.4573(10) |
| C(10)-C(11)  | 1.4984(11) | C(10)-H(10A) | 0.9900     |
| C(10)-H(10B) | 0.9900     | C(11)-N(15)  | 1.3311(10) |

|                     |            |                     |            |
|---------------------|------------|---------------------|------------|
| C(11)-N(12)         | 1.3338(10) | N(12)-N(13)         | 1.3445(10) |
| N(13)-N(14)         | 1.3135(10) | N(14)-N(15)         | 1.3487(10) |
| N(16)-H(16B)        | 0.909(14)  | N(16)-H(16D)        | 0.920(14)  |
| N(16)-H(16C)        | 0.896(14)  | N(16)-H(16A)        | 0.875(14)  |
| N(17)-H(17A)        | 0.898(14)  | N(17)-H(17B)        | 0.903(14)  |
| N(17)-H(17D)        | 0.903(14)  | N(17)-H(17C)        | 0.894(14)  |
| O(2)-N(3)-O(1)      | 120.63(7)  | O(2)-N(3)-N(4)      | 124.58(7)  |
| O(1)-N(3)-N(4)      | 114.79(7)  | N(3)-N(4)-C(5)      | 116.90(7)  |
| N(6)-C(5)-N(9)      | 107.68(7)  | N(6)-C(5)-N(4)      | 136.08(8)  |
| N(9)-C(5)-N(4)      | 116.24(7)  | C(5)-N(6)-N(7)      | 105.48(7)  |
| N(8)-N(7)-N(6)      | 111.48(7)  | N(7)-N(8)-N(9)      | 106.13(7)  |
| N(8)-N(9)-C(5)      | 109.22(7)  | N(8)-N(9)-C(10)     | 122.14(7)  |
| C(5)-N(9)-C(10)     | 128.29(7)  | N(9)-C(10)-C(11)    | 110.25(6)  |
| N(9)-C(10)-H(10A)   | 109.6      | C(11)-C(10)-H(10A)  | 109.6      |
| N(9)-C(10)-H(10B)   | 109.6      | C(11)-C(10)-H(10B)  | 109.6      |
| H(10A)-C(10)-H(10B) | 108.1      | N(15)-C(11)-N(12)   | 111.99(7)  |
| N(15)-C(11)-C(10)   | 124.86(7)  | N(12)-C(11)-C(10)   | 123.13(7)  |
| C(11)-N(12)-N(13)   | 104.60(7)  | N(14)-N(13)-N(12)   | 109.50(7)  |
| N(13)-N(14)-N(15)   | 109.35(7)  | C(11)-N(15)-N(14)   | 104.56(7)  |
| H(16B)-N(16)-H(16D) | 110.7(12)  | H(16B)-N(16)-H(16C) | 107.6(12)  |
| H(16D)-N(16)-H(16C) | 107.4(12)  | H(16B)-N(16)-H(16A) | 110.8(12)  |
| H(16D)-N(16)-H(16A) | 109.2(12)  | H(16C)-N(16)-H(16A) | 111.1(12)  |
| H(17A)-N(17)-H(17B) | 109.2(12)  | H(17A)-N(17)-H(17D) | 113.6(12)  |
| H(17B)-N(17)-H(17D) | 104.8(12)  | H(17A)-N(17)-H(17C) | 107.4(12)  |
| H(17B)-N(17)-H(17C) | 110.7(12)  | H(17D)-N(17)-H(17C) | 111.1(12)  |

**Table S9.** Hydrogen bonds for Compound **10** [Å and °].

| D-H...A                | d(D-H)    | d(H...A)  | d(D...A)   | <(DHA)    |
|------------------------|-----------|-----------|------------|-----------|
| N(16)-H(16B)...O(1)#1  | 0.909(14) | 1.975(14) | 2.8596(10) | 163.9(12) |
| N(16)-H(16D)...N(12)#2 | 0.920(14) | 1.995(14) | 2.8926(10) | 164.8(12) |
| N(16)-H(16C)...N(13)   | 0.896(14) | 2.309(14) | 3.0790(11) | 144.0(12) |
| N(17)-H(17A)...O(1)#1  | 0.898(14) | 2.086(15) | 2.9693(11) | 167.5(12) |
| N(17)-H(17B)...N(15)#1 | 0.903(14) | 2.029(14) | 2.9311(10) | 177.5(12) |
| N(17)-H(17D)...N(14)#4 | 0.903(14) | 2.109(14) | 2.9865(11) | 163.8(12) |
| N(17)-H(17C)...N(6)    | 0.894(14) | 2.060(14) | 2.9095(11) | 158.3(12) |
| N(16)-H(16A)...N(13)#6 | 0.875(14) | 2.172(14) | 2.9794(11) | 153.2(12) |

Symmetry transformations used to generate equivalent atoms:

#1  $x, -y+1/2, z+1/2$  #2  $x+1, y, z$  #3  $-x+1, y-1/2, -z+1/2$   
 #4  $-x+1, y+1/2, -z+1/2$  #5  $x+1, -y+1/2, z+1/2$  #6  $-x+1, -y, -z+1$



**Table S10.** Crystal data and structure refinement for Compound **13**.

|                                   |                                                               |                   |
|-----------------------------------|---------------------------------------------------------------|-------------------|
| Identification code               | shrv489                                                       |                   |
| Empirical formula                 | C <sub>9</sub> H <sub>16</sub> N <sub>26</sub> O <sub>2</sub> |                   |
| Formula weight                    | 520.48                                                        |                   |
| Temperature                       | 150(2) K                                                      |                   |
| Wavelength                        | 0.71073 Å                                                     |                   |
| Crystal system                    | Monoclinic                                                    |                   |
| Space group                       | P2 <sub>1</sub> /n                                            |                   |
| Unit cell dimensions              | a = 6.8412(2) Å                                               | α = 90°.          |
|                                   | b = 16.3568(4) Å                                              | β = 91.2720(10)°. |
|                                   | c = 17.7892(4) Å                                              | γ = 90°.          |
| Volume                            | 1990.12(9) Å <sup>3</sup>                                     |                   |
| Z                                 | 4                                                             |                   |
| Density (-123°C)                  | 1.737 Mg/m <sup>3</sup>                                       |                   |
| Density (20°C)                    | 1.717 Mg/m <sup>3</sup>                                       |                   |
| Absorption coefficient            | 0.138 mm <sup>-1</sup>                                        |                   |
| F(000)                            | 1072                                                          |                   |
| Crystal size                      | 0.354 x 0.220 x 0.105 mm <sup>3</sup>                         |                   |
| Theta range for data collection   | 2.290 to 29.991°.                                             |                   |
| Index ranges                      | -9 ≤ h ≤ 9, -22 ≤ k ≤ 20, -24 ≤ l ≤ 24                        |                   |
| Reflections collected             | 23403                                                         |                   |
| Independent reflections           | 5613 [R <sub>int</sub> = 0.0240]                              |                   |
| Completeness to theta = 25.242°   | 99.9 %                                                        |                   |
| Absorption correction             | Semi-empirical from equivalents                               |                   |
| Max. and min. transmission        | 0.7460 and 0.7087                                             |                   |
| Refinement method                 | Full-matrix least-squares on F <sup>2</sup>                   |                   |
| Data / restraints / parameters    | 5613 / 0 / 354                                                |                   |
| Goodness-of-fit on F <sup>2</sup> | 1.026                                                         |                   |
| Final R indices [I > 2σ(I)]       | R <sub>1</sub> = 0.0370, wR <sub>2</sub> = 0.0922             |                   |
| R indices (all data)              | R <sub>1</sub> = 0.0463, wR <sub>2</sub> = 0.0977             |                   |
| Largest diff. peak and hole       | 0.300 and -0.337 e.Å <sup>-3</sup>                            |                   |
| CCDC No                           | 1554456                                                       |                   |

**Table S11.** Bond lengths [Å] and angles [°] for Compound **13**.

|              |            |              |            |
|--------------|------------|--------------|------------|
| O(1)-N(3)    | 1.2530(12) | O(2)-N(3)    | 1.2559(12) |
| N(3)-N(4)    | 1.3267(13) | N(4)-C(5)    | 1.3683(14) |
| C(5)-N(6)    | 1.3336(14) | C(5)-N(9)    | 1.3556(14) |
| N(6)-N(7)    | 1.3627(14) | N(7)-N(8)    | 1.2925(14) |
| N(8)-N(9)    | 1.3530(13) | N(9)-C(10)   | 1.4704(14) |
| C(10)-C(11)  | 1.4932(15) | C(10)-H(10A) | 0.9900     |
| C(10)-H(10B) | 0.9900     | C(11)-N(12)  | 1.3316(14) |

|                     |            |                     |            |
|---------------------|------------|---------------------|------------|
| C(11)-N(15)         | 1.3364(14) | N(12)-N(13)         | 1.3456(14) |
| N(13)-N(14)         | 1.3153(14) | N(14)-N(15)         | 1.3418(13) |
| N(16)-C(17)         | 1.3320(14) | N(16)-H(16A)        | 0.856(17)  |
| N(16)-H(16B)        | 0.885(17)  | C(17)-N(26)         | 1.3434(14) |
| C(17)-N(18)         | 1.3482(14) | N(18)-C(24)         | 1.3535(14) |
| N(18)-N(19)         | 1.3960(12) | N(19)-C(20)         | 1.3185(15) |
| C(20)-N(21)         | 1.3352(14) | C(20)-N(22)         | 1.3975(14) |
| N(21)-H(21A)        | 0.8800     | N(21)-H(21B)        | 0.8800     |
| N(22)-C(24)         | 1.3629(14) | N(22)-N(23)         | 1.3936(13) |
| N(23)-H(23A)        | 0.872(19)  | N(23)-H(23B)        | 0.915(19)  |
| C(24)-N(25)         | 1.3117(14) | N(25)-N(26)         | 1.4087(13) |
| N(26)-H(26)         | 0.8800     | N(27)-C(28)         | 1.3219(14) |
| N(27)-H(27A)        | 0.8800     | N(27)-H(27B)        | 0.8800     |
| C(28)-N(37)         | 1.3418(14) | C(28)-N(29)         | 1.3461(13) |
| N(29)-C(35)         | 1.3602(13) | N(29)-N(30)         | 1.3965(12) |
| N(30)-C(31)         | 1.3301(14) | C(31)-N(32)         | 1.3237(14) |
| C(31)-N(33)         | 1.3958(14) | N(32)-H(32A)        | 0.8800     |
| N(32)-H(32B)        | 0.8800     | N(33)-C(35)         | 1.3694(14) |
| N(33)-N(34)         | 1.3976(13) | N(34)-H(34A)        | 0.899(16)  |
| N(34)-H(34B)        | 0.867(16)  | C(35)-N(36)         | 1.3055(14) |
| N(36)-N(37)         | 1.4112(13) | N(37)-H(37)         | 0.8800     |
| O(1)-N(3)-O(2)      | 120.15(9)  | O(1)-N(3)-N(4)      | 115.62(9)  |
| O(2)-N(3)-N(4)      | 124.23(9)  | N(3)-N(4)-C(5)      | 115.77(9)  |
| N(6)-C(5)-N(9)      | 107.97(9)  | N(6)-C(5)-N(4)      | 134.25(10) |
| N(9)-C(5)-N(4)      | 117.77(9)  | C(5)-N(6)-N(7)      | 105.35(9)  |
| N(8)-N(7)-N(6)      | 111.95(9)  | N(7)-N(8)-N(9)      | 106.00(9)  |
| N(8)-N(9)-C(5)      | 108.68(9)  | N(8)-N(9)-C(10)     | 122.35(9)  |
| C(5)-N(9)-C(10)     | 128.26(9)  | N(9)-C(10)-C(11)    | 111.28(9)  |
| N(9)-C(10)-H(10A)   | 109.4      | C(11)-C(10)-H(10A)  | 109.4      |
| N(9)-C(10)-H(10B)   | 109.4      | C(11)-C(10)-H(10B)  | 109.4      |
| H(10A)-C(10)-H(10B) | 108.0      | N(12)-C(11)-N(15)   | 112.25(10) |
| N(12)-C(11)-C(10)   | 125.05(10) | N(15)-C(11)-C(10)   | 122.70(10) |
| C(11)-N(12)-N(13)   | 104.33(9)  | N(14)-N(13)-N(12)   | 109.48(9)  |
| N(13)-N(14)-N(15)   | 109.65(9)  | C(11)-N(15)-N(14)   | 104.28(9)  |
| C(17)-N(16)-H(16A)  | 118.3(11)  | C(17)-N(16)-H(16B)  | 115.8(10)  |
| H(16A)-N(16)-H(16B) | 116.9(14)  | N(16)-C(17)-N(26)   | 130.64(10) |
| N(16)-C(17)-N(18)   | 125.05(10) | N(26)-C(17)-N(18)   | 104.28(9)  |
| C(17)-N(18)-C(24)   | 107.87(9)  | C(17)-N(18)-N(19)   | 137.64(9)  |
| C(24)-N(18)-N(19)   | 114.21(9)  | C(20)-N(19)-N(18)   | 101.00(9)  |
| N(19)-C(20)-N(21)   | 125.79(11) | N(19)-C(20)-N(22)   | 113.92(9)  |
| N(21)-C(20)-N(22)   | 120.24(11) | C(20)-N(21)-H(21A)  | 120.0      |
| C(20)-N(21)-H(21B)  | 120.0      | H(21A)-N(21)-H(21B) | 120.0      |
| C(24)-N(22)-N(23)   | 130.59(9)  | C(24)-N(22)-C(20)   | 105.94(9)  |
| N(23)-N(22)-C(20)   | 123.04(9)  | N(22)-N(23)-H(23A)  | 108.1(12)  |
| N(22)-N(23)-H(23B)  | 108.0(11)  | H(23A)-N(23)-H(23B) | 111.0(16)  |

|                     |            |                     |            |
|---------------------|------------|---------------------|------------|
| N(25)-C(24)-N(18)   | 113.84(10) | N(25)-C(24)-N(22)   | 141.21(10) |
| N(18)-C(24)-N(22)   | 104.90(9)  | C(24)-N(25)-N(26)   | 100.69(9)  |
| C(17)-N(26)-N(25)   | 113.30(9)  | C(17)-N(26)-H(26)   | 123.4      |
| N(25)-N(26)-H(26)   | 123.4      | C(28)-N(27)-H(27A)  | 120.0      |
| C(28)-N(27)-H(27B)  | 120.0      | H(27A)-N(27)-H(27B) | 120.0      |
| N(27)-C(28)-N(37)   | 129.11(10) | N(27)-C(28)-N(29)   | 126.44(10) |
| N(37)-C(28)-N(29)   | 104.42(9)  | C(28)-N(29)-C(35)   | 107.51(9)  |
| C(28)-N(29)-N(30)   | 137.82(9)  | C(35)-N(29)-N(30)   | 114.48(9)  |
| C(31)-N(30)-N(29)   | 100.88(8)  | N(32)-C(31)-N(30)   | 126.26(10) |
| N(32)-C(31)-N(33)   | 119.92(10) | N(30)-C(31)-N(33)   | 113.80(9)  |
| C(31)-N(32)-H(32A)  | 120.0      | C(31)-N(32)-H(32B)  | 120.0      |
| H(32A)-N(32)-H(32B) | 120.0      | C(35)-N(33)-C(31)   | 106.27(9)  |
| C(35)-N(33)-N(34)   | 131.45(9)  | C(31)-N(33)-N(34)   | 122.27(9)  |
| N(33)-N(34)-H(34A)  | 109.9(10)  | N(33)-N(34)-H(34B)  | 109.3(10)  |
| H(34A)-N(34)-H(34B) | 109.9(14)  | N(36)-C(35)-N(29)   | 114.17(10) |
| N(36)-C(35)-N(33)   | 141.18(10) | N(29)-C(35)-N(33)   | 104.56(9)  |
| C(35)-N(36)-N(37)   | 100.48(8)  | C(28)-N(37)-N(36)   | 113.42(9)  |
| C(28)-N(37)-H(37)   | 123.3      | N(36)-N(37)-H(37)   | 123.3      |

**Table S12.** Hydrogen bonds for Compound **13** [ $\text{\AA}$  and  $^\circ$ ].

| D-H...A                | d(D-H)    | d(H...A)  | d(D...A)   | $\angle(\text{DHA})$ |
|------------------------|-----------|-----------|------------|----------------------|
| N(16)-H(16A)...N(7)#1  | 0.856(17) | 2.096(17) | 2.9361(15) | 166.9(15)            |
| N(16)-H(16B)...N(14)#2 | 0.885(17) | 2.014(17) | 2.8744(14) | 163.6(14)            |
| N(21)-H(21A)...N(12)#3 | 0.88      | 2.35      | 3.0078(14) | 131.4                |
| N(21)-H(21B)...N(8)#3  | 0.88      | 2.39      | 3.1532(15) | 144.7                |
| N(23)-H(23A)...N(15)#4 | 0.872(19) | 2.157(19) | 3.0168(15) | 168.9(16)            |
| N(26)-H(26)...O(2)#1   | 0.88      | 2.24      | 2.9778(13) | 140.6                |
| N(26)-H(26)...N(6)#1   | 0.88      | 2.11      | 2.8784(13) | 145.1                |
| N(27)-H(27A)...O(1)#6  | 0.88      | 2.31      | 2.9247(13) | 126.6                |
| N(27)-H(27A)...O(2)#6  | 0.88      | 2.06      | 2.9355(13) | 174.1                |
| N(27)-H(27B)...N(15)#7 | 0.88      | 2.23      | 3.0403(14) | 152.6                |
| N(32)-H(32A)...O(1)#7  | 0.88      | 2.11      | 2.8623(13) | 143.2                |
| N(32)-H(32B)...N(13)#3 | 0.88      | 2.19      | 2.9604(14) | 146.7                |
| N(34)-H(34A)...N(12)   | 0.899(16) | 2.277(16) | 3.1624(15) | 168.6(14)            |
| N(37)-H(37)...N(25)#8  | 0.88      | 2.09      | 2.9488(13) | 163.8                |

Symmetry transformations used to generate equivalent atoms:

#1  $-x+3/2, y-1/2, -z+3/2$  #2  $x-1, y, z$  #3  $-x+2, -y+2, -z+1$

#4  $x-1/2, -y+3/2, z-1/2$  #5  $x+1/2, -y+3/2, z-1/2$

#6  $-x+1, -y+2, -z+2$  #7  $-x+3/2, y+1/2, -z+3/2$  #8  $x-1/2, -y+3/2, z+1/2$

**Table S13** Energetic properties of compounds **2-13**

|            | $\rho^{[a]}$          | $Dv^{[b]}$ | $p^{[c]}$ | $\Delta H_f^{[d]}$ | $T_m^{[e]}$ | $T_{dec}^{[f]}$ | $IS^{[g]}$ | $FS^{[h]}$ | $N^{[i]}$ | $N+O^{[j]}$ |
|------------|-----------------------|------------|-----------|--------------------|-------------|-----------------|------------|------------|-----------|-------------|
|            | (g·cm <sup>-3</sup> ) | (m/s)      | (GPa)     | (kJ/g)             | (°C)        | (°C)            | (J)        | (N)        | (%)       | (%)         |
| <b>2</b>   | 1.61                  | 7780       | 20.9      | 3.20               | 213         | 217             | >40        | >360       | 75.43     | 75.43       |
| <b>3</b>   | 1.79                  | 8857       | 31.2      | 1.95               | 147         | 156             | 28         | 240        | 60.86     | 81.71       |
| <b>4</b>   | 1.76                  | 8652       | 29.6      | 2.90               | –           | 178             | 12         | 160        | 66.03     | 81.11       |
| <b>5</b>   | 1.49                  | 7476       | 18.1      | 2.74               | 172         | 239             | >40        | >360       | 76.06     | 76.06       |
| <b>6</b>   | 1.60                  | 8330       | 23.5      | 3.26               | 150         | 244             | >40        | >360       | 77.36     | 77.36       |
| <b>7</b>   | 1.59                  | 8155       | 23.1      | 2.75               | 164         | 172             | >40        | >360       | 69.98     | 77.97       |
| <b>8</b>   | 1.62                  | 7912       | 21.5      | 3.20               | 241         | 246             | >40        | >360       | 74.12     | 74.12       |
| <b>9</b>   | 1.94                  | 7174       | 19.3      | 0.41               | –           | 306             | >40        | >360       | 48.58     | 59.68       |
| <b>10</b>  | 1.60                  | 8076       | 22.6      | 1.57               | –           | 229             | >40        | >360       | 68.27     | 81.27       |
| <b>11</b>  | 1.62                  | 8654       | 26.9      | 2.64               | –           | 224             | >40        | >360       | 70.99     | 82.57       |
| <b>12</b>  | 1.69                  | 8778       | 29.5      | 1.83               | –           | 186             | >40        | >360       | 60.42     | 83.42       |
| <b>13</b>  | 1.71                  | 8499       | 26.5      | 3.14               | 147         | 238             | >40        | >360       | 69.98     | 76.13       |
| <b>TNT</b> | 1.65                  | 7303       | 21.3      | -0.26              | 81          | 295             | 15         | >353       | 18.50     | 60.76       |
| <b>RDX</b> | 1.80                  | 8795       | 34.9      | 0.32               | –           | 204             | 7.5        | 120        | 37.84     | 81.06       |

[a] Density - gas pycnometer at 25 °C; [b] Calculated detonation velocity; [c] Calculated detonation pressure; [d] Calculated molar enthalpy of formation; [e] Melting point (onset); [f] Temperature of decomposition (onset); [g] Impact sensitivity; [h] Friction sensitivity; [i] Nitrogen content; [j] Combined nitrogen and oxygen content.
